# Supplementary material
Source: publisher figshare collection journal article supplement (https://gsajournals.figshare.com/ndownloader/files/12404519)
Supplement: Supplementary file 1 [file 12404519]

**Table S3.** List of primers used in ChIP-qPCR experiments.

| Locus | Primer Name | Primer Sequence |
| --- | --- | --- |
| CEN1 | OMB426 | CTCGATTTGCATAAGTGTGCC |
|  | OMB427 | GTGCTTAAGAGTTCTGTACCAC |
| CEN3 | OMB1690 | GAT CAG CGC CAA ACA ATA TGG |
|  | OMB1691 | AAC TTC CAC CAG TAA ACG TTT C |
| R3 | OMB2652 | AAT TTT ACC AGC TTC AAT AAC |
|  | OMB2653 | TGA AGT TCA ATG TCA AAG TC |
| R4 | OMB2650 | TCC GAA AAG TAA AAT AAC GTT |
|  | OMB2651 | CAG GGT AGC ATA AAC CTG CTG |
| R6 | OMB2646 | GTT ATG GTG TGT GGC GAG TG |
|  | OMB2647 | AGC GAC TCA AGA CGT TGG AC |
| R7 | OMB2644 | CAG GGA TGC CCT TCT ACA AA |
|  | OMB2645 | GTG CAG ATC TAA GGC GGA AG |
| R11 | OMB2919 | CGA AAT TTT CAC AAC CAA AGG |
|  | OMB2920 | TTT GAT GCT GTG TGG TGA CTT |
| R5 | OMB2648 | TGC GAT TGT CGT GTA ATG GT |
|  | OBM2649 | GCA TGG GGA AAG AAA CAC TT |
| R8 | OMB2642 | GGT GCA TGT CAA TGT TTA TCA |
|  | OMB2643 | CGC CTG TCG CTA CTC ACT CT |
| R12 | OMB2925 | TTC ATC GTC ATC ATC GTC GT |
|  | OMB2926 | AAG GTC GTT TCC TGC ACA AT |
| R9 | OMB2640 | ACA CAC AAG CCC TCT CAA CC |
|  | OMB2641 | AAT ATG GCA TGG CGA AAG AG |
| R10 | OMB2638 | CAT CCG CTC TAA CCG AAA AG |
|  | OMB2639 | CCC AAA ACC TTC TCA AGC AA |
| R13 | OMB2923 | AGC TGA AAA CAT GGG AGC AT |
|  | OMB2924 | TCG CCT TAC CGT AAA CTT GG |
| R14 | OMB2921 | AAT GCC CTC TCC GGA AAT AC |
|  | OMB2922 | AAT AGC CGG ACC TGT CAA GA |
| R15 | OMB2927 | AAG CCA GAT AGC GGC AAC T |
|  | OMB2828 | CAC TCA CAG CTG GCA TTA ACA |
| R16 | OMB2929 | CAT TTC TTC TGG ATT GGC TGA |
|  | OMB2930 | ACA TTG AGA GGC AGC TTG GT |
